# Supplementary material for: High bacterial organic carbon uptake in the Eastern Tropical South Pacific oxygen minimum zone
Source: Copernicus journal article supplement (doi:10.5194/bg-2019-237), 2019-06-17
Supplement: Supplementary file 1 [file bg-2019-237-supplement.pdf]

1 **Supporting information**

2 This supplementary includes the following supporting information:

3 **Supplementary Methods:** Detailed description of dissolved organic carbon and dissolved oxygen flux calculations.

4 **Supplementary Discussion:** Discussion about the incubation of extracellular enzyme samples under N<sub>2</sub> atmosphere.

5 **Supplementary Figure 1:** Extracellular enzyme rates with all samples incubated under N<sub>2</sub> atmosphere irrespective  
6 of the *in situ* oxygen concentration.

7 **Supplementary Table 1:** Cruise, date, positions, sampled depths and bottom depth of all stations represented within  
8 the manuscript.

9 **Supplementary Table 2:** Average and standard deviation at different oxygen regimes of all discussed parameters.

10

11 **Supplementary Methods:**

12 **Diapycnal fluxes of oxygen and dissolved organic carbon**

13 The mixing of DOC and oxygen across density surfaces is derived following Fischer et al. (2013) and Schafstall et  
14 al. (2010). Gradients of DOC were calculated between sampled bottles assuming a constant gradient in between  
15 while oxygen gradients were derived by fitting a linear trend over 3 m intervals, as oxygen is available on a much  
16 higher vertical resolution of 1dbar.

17 The diapycnal flux of solutes, i.e. DOC and oxygen, is calculated as

$$\Phi_S = -K_\rho \nabla C_S$$

18 Where  $\nabla C_S$  is the vertical gradient of the solute – in case of oxygen the concentration is converted from  $\mu\text{mol kg}^{-1}$  to  
19  $\mu\text{mol m}^{-3}$  beforehand – and  $K_\rho$  is the diapycnal diffusivity of mass. We assume  $K_\rho$  to be equal to the diffusivity of  
20 DOC and oxygen, i.e.  $K_\rho = K_{DOC} = K_{DO}$  as done by Fischer et al. (2013) for oxygen.

21 The diapycnal diffusivity is calculated following Osborn (1980):

$$K_\rho = \Gamma \frac{\varepsilon}{N^2}$$

22 Where  $\Gamma = 0.2$  is the mixing efficiency,  $\varepsilon$  ( $\text{m}^2 \text{s}^{-3}$ ) is the dissipation rate of turbulent kinetic energy calculated by  
23 integrating the shear spectra derived from measurements on a freefalling microstructure probe at stations G-N & Q-T  
24 (Sea & Sun Technology, MSS90D, S/N26 up to CTD 43, S/N 73 afterwards) (Schafstall et al., 2010), and  $N$  ( $\text{s}^{-1}$ ) is  
25 the buoyancy frequency derived from CTD downcast profiles over 7 dbar intervals where DOC and oxygen were  
26 measured as well.

27 To calculate  $K_\rho$ , data from CTD profiles we combined with nearby microstructure profiles conducted directly before  
28 or after the CTD profile which existed for 12 profile. For each solutes gradient between two samples a  $K_\rho$  value was  
29 derived from dissipation and buoyancy frequency averaged between the potential densities of the two solutes  
30 samples. The mean  $K_\rho$  profile exhibits only weak vertical variations (Supplementary Figure 2a) therefore a constant  
31  $K_\rho = 10^{-3} \text{m}^2 \text{s}^{-1}$  was used to calculate fluxes.

32 For each profile a  $\Phi_S$  profile is calculated in 20 m depth bins, from these a mean profile of diapycnal flux is derived.  
33 Subsequent, the vertical divergence of the mean flux profile of DOC or oxygen is given by  $\nabla \Phi_S = -\frac{\partial}{\partial z} \Phi_S$ .

34 The error estimates of these terms are calculated following Schafstall et al. (2010), with the error of the mean  
35  $K_\rho$  given by:

$$\Delta K_\rho = K_\rho \left[ \left( \frac{\Delta \Gamma}{\Gamma} \right)^2 + \left( \frac{\Delta \varepsilon}{\varepsilon} \right)^2 + \left( \frac{\Delta N^2}{N^2} \right)^2 \right]^{\frac{1}{2}}$$

36 And the error of the mean flux by

$$\Delta\Phi_S = \Phi_S \left[ \left( \frac{\Delta\Gamma}{\Gamma} \right)^2 + \left( \frac{\Delta\varepsilon}{\varepsilon} \right)^2 + \left( \frac{\Delta N^2}{N^2} \right) + \left( \frac{\Delta\nabla C_S}{\nabla C_S} \right) \right]^{\frac{1}{2}}$$

37 Where  $K_p$  and  $\Phi_S$  are the mean profiles calculated from the individual profiles in 20 m depth bins, a constant  
38  $\Delta\Gamma = 0.04$  is used (Schafstall et al., 2010), the error of dissipation  $\Delta\varepsilon$  is the 95%-confidence interval derived by  
39 bootstrapping,  $\Delta N^2$  and  $\Delta\nabla C_S$  are the standard deviations of the mean. Bootstrapping and standard deviations are  
40 performed on the values of the individual profiles in 20 m bins. The error of the change in the diapycnal flux over  
41 depth is derived by error propagation from the flux.

## 42 **Supplementary Discussion:**

### 43 **Incubation of extracellular enzyme samples under N<sub>2</sub> atmosphere**

44 Enzyme rates of suboxic waters have been obtained by incubating samples under N<sub>2</sub> atmosphere to reduce oxygen  
45 concentrations. For the assessment of extracellular enzyme rates we chose to incubate samples at oxic and reduced  
46 oxygen concentrations depending on oxygen concentrations at *in situ* depth (see methods for details). Incubation  
47 conditions slightly influenced the resulting enzyme rates. Incubating samples from depths with *in situ* oxygen  
48 concentrations <5  $\mu\text{mol kg}^{-1}$  under N<sub>2</sub> atmosphere, instead of under atmospheric oxygen concentrations, yielded on  
49 average 2-27% higher rates. Consequently, the differences in rates between oxic and suboxic waters became reduced,  
50 when all samples were incubated under N<sub>2</sub> atmosphere (supplementary Figure 2). However, the observed trends over  
51 depth remained similar. Possible reasons for higher extracellular enzyme rates after incubation under N<sub>2</sub> atmosphere  
52 are changes in (i) pH, (ii) the abundance of oxygen radicals and/or (iii) changes in enzyme production. (i) Higher  
53 extracellular enzyme rates after incubations at low oxygen concentrations are less likely driven by the resulting  
54 increase in pH ( $\Delta 0.4$ ), since earlier studies rather suggested that extracellular enzyme rates decrease with pH  
55 (Endres et al., 2014; Piontek et al., 2013). (ii) Oxygen radicals can destroy enzymes (Elstner, 1990). Since our  
56 incubations were not completely anoxic, an influence of oxygen radicals on enzyme activity cannot be excluded, but  
57 would appear under aerobic and N<sub>2</sub> atmosphere. (iii) Finally, an enhanced production of enzymes within the 12 hours  
58 of incubation time might be the reason for higher rates after incubations under N<sub>2</sub> atmosphere. It has been shown  
59 before that enzymes can be produced within 30 minutes (Both et al., 1972), making this explanation likely. The final  
60 reason for higher enzyme productions under N<sub>2</sub> atmosphere remains a matter of speculation, but supports the trends  
61 seen in the depth profiles and does not restrict the interpretation of the extracellular enzyme data.

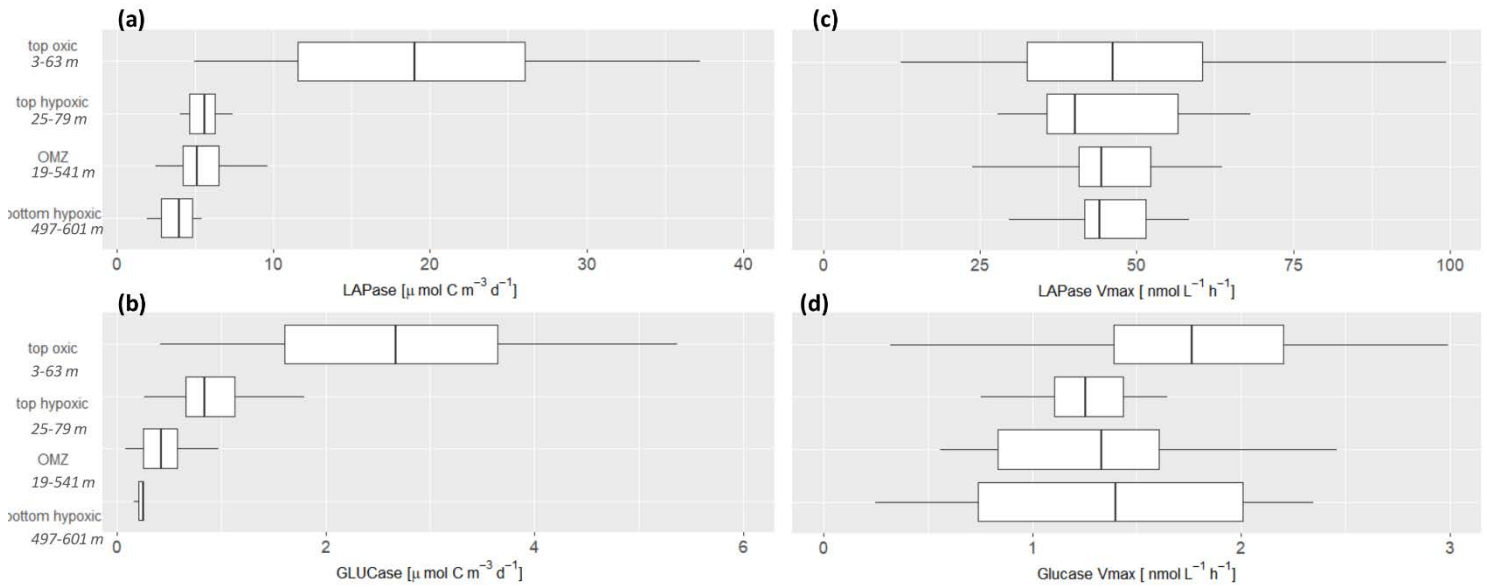

63

64

65 **Supplementary Figure 1:** Extracellular enzyme rates with all samples incubated under  $\text{N}_2$  atmosphere irrespective  
 66 of the *in situ* oxygen concentration. Degradation rates of dissolved amino acids (DHAA) by leucine-aminopeptidase  
 67 (LAPase) (a), degradation rates of high molecular weight dissolved carbohydrates (DCHO) by  $\beta$ -glucosidase  
 68 (GLUCase) (b) total potential LAPase rates ( $V_{\text{max}}$ ) (c), Glucose  $V_{\text{max}}$  (d) at different oxygen regimes.

69

70

71

72

73

74

75

76

77

78

79

80

81 **Supplementary Table 1:** Cruise, date, positions, sampled depths and bottom depth of all stations represented within the  
82 manuscript. Extracellular enzyme rates were sampled at stations A-K, whereas some depths were not used for further  
83 analyses, since the standard deviation was over 30%. Bacterial biomass production was sampled at stations G-T.  
84 Stations G-T were included in the estimation of carbon and oxygen loss rates. Cell abundance was sampled at every  
85 station.

| Cruise | Station | Latitude | Longitude | Date       | Sampled Depth |     |     |     |      | Bottom Depth |
|--------|---------|----------|-----------|------------|---------------|-----|-----|-----|------|--------------|
| M138   | A       | -15.5393 | -75.6149  | 06/19/2017 | 3             | 17  | 24  | 28  | 39   | 2507         |
|        |         |          |           |            | 99            | 197 | 396 | 596 | 1499 |              |
| M138   | B       | -15.8595 | -76.1099  | 06/21/2017 | 5             | 18  | 40  | 50  | 53   | 2624         |
|        |         |          |           |            | 90            | 199 | 398 | 600 |      |              |
| M138   | C       | -16.1593 | -76.5711  | 06/21/2017 | 3             | 13  | 19  | 58  | 63   | 3679         |
|        |         |          |           |            | 79            | 99  | 149 | 197 | 347  | 600          |
| M138   | D       | -13.9971 | -76.6598  | 06/16/2017 | 3             | 8   | 19  | 48  | 70   | 586          |
|        |         |          |           |            | 98            | 117 | 197 | 397 | 498  | 541          |
| M138   | E       | -14.2988 | -77.1796  | 06/17/2017 | 19            | 38  | 47  | 66  | 97   | 4702         |
|        |         |          |           |            | 147           | 198 | 299 | 398 | 497  | 601          |
| M138   | F       | -14.7596 | -77.4829  | 06/23/2017 | 9             | 28  | 48  | 53  | 99   | 4154         |
|        |         |          |           |            | 148           | 197 | 297 | 397 | 497  | 601          |
| M136   | G       | -12.2248 | -77.1795  | 04/27/2017 | 4             | 20  | 25  | 30  | 39   | 75           |
|        |         |          |           |            | 49            | 59  | 72  |     |      |              |
| M136   | H       | -12.3584 | -77.3621  | 04/25/2017 | 3             | 6   | 27  | 39  | 48   | 194          |
|        |         |          |           |            | 58            | 68  | 79  | 98  | 128  |              |
| M136   | I       | -12.453  | -77.4918  | 04/26/2017 | 4             | 18  | 28  | 39  | 49   | 403          |
|        |         |          |           |            | 59            | 73  | 199 |     |      |              |
| M136   | J       | -12.5807 | -77.6731  | 04/29/2017 | 4             | 28  | 49  | 68  | 78   | 973          |
|        |         |          |           |            | 99            | 195 | 393 | 448 | 498  | 598          |
| M136   | K       | -12.338  | -78.0512  | 04/26/2017 | 9             | 50  | 75  | 99  | 148  | 1970         |
|        |         |          |           |            | 157           | 199 | 299 | 398 | 499  | 599          |
| M136   | L       | -12.2782 | -77.2493  | 04/20/2017 | 4             | 9   | 13  | 19  | 23   | 130          |
|        |         |          |           |            | 28            | 43  | 48  | 58  |      |              |
| M136   | M       | -12.5806 | -77.6731  | 04/19/2017 | 3             | 19  | 39  | 55  | 65   | 242          |
|        |         |          |           |            | 90            | 98  | 199 | 238 |      |              |
| M136   | N       | -12.4134 | -77.4425  | 04/21/2017 | 3             | 18  | 50  | 99  | 124  | 307          |
|        |         |          |           |            | 149           | 174 | 224 | 272 | 300  |              |
| M136   | O       | -12.5226 | -77.5834  | 04/20/2017 | 4             | 29  | 39  | 49  | 59   | 751          |
|        |         |          |           |            | 79            | 89  | 98  | 147 | 597  | 745          |
| M136   | P       | -12.9873 | -78.2471  | 04/21/2017 | 4             | 29  | 49  | 60  | 74   | 5410         |
|        |         |          |           |            | 99            | 196 | 296 | 396 | 599  | 800          |
| M136   | Q       | -13.8938 | -76.5101  | 04.12.2017 | 4             | 10  | 15  | 19  | 30   | 166          |
|        |         |          |           |            | 39            | 50  | 69  | 99  | 128  | 159          |
| M136   | R       | -14.1878 | -76.9312  | 04/13/2017 | 5             | 14  | 29  | 49  | 81   | 3042         |
|        |         |          |           |            | 101           | 123 | 199 | 399 | 599  |              |
| M136   | S       | -14.3986 | -77.2389  | 04/14/2017 | 1             | 49  | 89  | 99  | 148  | 5149         |
|        |         |          |           |            | 198           | 299 | 399 | 499 | 599  |              |
| M136   | T       | -12.2254 | -77.1797  | 04/24/2017 | 4             | 19  | 24  | 28  | 49   | 76           |

86

87

88

89 **Supplementary Table 2:** Average and standard deviation at different oxygen regimes of all discussed parameters as  
 90 total rates **(a)** and cell-specific rates **(b)**.

| <b>a</b>                                    |                |                      |          |             |           |                                          |
|---------------------------------------------|----------------|----------------------|----------|-------------|-----------|------------------------------------------|
| <b>parameter</b>                            | <b>station</b> | <b>oxygen regime</b> | <b>n</b> | <b>mean</b> | <b>SD</b> | <b>unit</b>                              |
| <b>cell abundance</b>                       | A-T            | top oxic             | 52       | 19          | 9         | cells x 10 <sup>5</sup> mL <sup>-1</sup> |
|                                             |                | top high hypoxic     | 16       | 9           | 3         |                                          |
|                                             |                | top low hypoxic      | 20       | 8           | 3         |                                          |
|                                             |                | OMZ                  | 93       | 9           | 5         |                                          |
|                                             |                | bottom low hypoxic   | 14       | 1           | 0.1       |                                          |
|                                             |                | top oxycline         | 36       | 9           | 3         |                                          |
| <b>bacterial production</b>                 | G-T            | top oxic             | 34       | 194         | 189       | μmol C m <sup>-3</sup> d <sup>-1</sup>   |
|                                             |                | top high hypoxic     | 11       | 58          | 61        |                                          |
|                                             |                | top low hypoxic      | 17       | 43          | 38        |                                          |
|                                             |                | OMZ                  | 48       | 26          | 32        |                                          |
|                                             |                | bottom low hypoxic   | 5        | 5           | 3         |                                          |
|                                             |                | oxycline             | 33       | 42          | 47        |                                          |
| <b>degradation rates of DHAA by LAPase</b>  | A-K            | top oxic             | 20       | 13.9        | 7.6       | μmol C m <sup>-3</sup> d <sup>-1</sup>   |
|                                             |                | top high hypoxic     | 6        | 4.5         | 3.0       |                                          |
|                                             |                | top low hypoxic      | 9        | 2.4         | 1.2       |                                          |
|                                             |                | OMZ                  | 41       | 5.0         | 1.8       |                                          |
|                                             |                | bottom low hypoxic   | 6        | 2.4         | 1.6       |                                          |
| <b>degradation rates of DCHO by GLUCase</b> | A-K            | top oxic             | 22       | 2.7         | 2.5       | μmol C m <sup>-3</sup> d <sup>-1</sup>   |
|                                             |                | top high hypoxic     | 7        | 1.5         | 1.0       |                                          |
|                                             |                | top low hypoxic      | 8        | 0.8         | 0.5       |                                          |
|                                             |                | OMZ                  | 35       | 0.7         | 1.4       |                                          |
|                                             |                | bottom low hypoxic   | 3        | 0.4         | 0.3       |                                          |
| <b>LAPase Vmax</b>                          | A-K            | top oxic             | 22       | 39.2        | 13.3      | nmol L <sup>-1</sup> h <sup>-1</sup>     |
|                                             |                | top high hypoxic     | 10       | 41.1        | 24.0      |                                          |
|                                             |                | top low hypoxic      | 10       | 28.9        | 13.6      |                                          |
|                                             |                | OMZ                  | 49       | 49.9        | 22.1      |                                          |
|                                             |                | bottom low hypoxic   | 6        | 31.3        | 6.0       |                                          |
| <b>GLUCase Vmax</b>                         | A-K            | top oxic             | 26       | 1.6         | 0.6       | nmol L <sup>-1</sup> h <sup>-1</sup>     |
|                                             |                | top high hypoxic     | 9        | 1.4         | 0.5       |                                          |
|                                             |                | top low hypoxic      | 11       | 1.0         | 0.3       |                                          |
|                                             |                | OMZ                  | 41       | 1.6         | 1.6       |                                          |
|                                             |                | bottom low hypoxic   | 4        | 0.7         | 0.4       |                                          |

91

92

93

94

95

96

| <b>b</b>                                                  |                |                      |          |             |           |                                         |
|-----------------------------------------------------------|----------------|----------------------|----------|-------------|-----------|-----------------------------------------|
| <b>parameter</b>                                          | <b>station</b> | <b>oxygen regime</b> | <b>n</b> | <b>mean</b> | <b>SD</b> | <b>unit</b>                             |
| <b>cell-specific bacterial productio</b>                  | G-T            | top oxic             | 34       | 92          | 78        | amol C cell d <sup>-1</sup>             |
|                                                           |                | top high hypoxic     | 11       | 50          | 36        |                                         |
|                                                           |                | top low hypoxic      | 17       | 46          | 27        |                                         |
|                                                           |                | OMZ                  | 48       | 22          | 19        |                                         |
|                                                           |                | bottom low hypoxic   | 5        | 35          | 23        |                                         |
|                                                           |                | oxycline             | 33       | 45          | 29        |                                         |
| <b>cell-specific Degradation rates of DHAA by LAPase</b>  | A-K            | top oxic             | 20       | 6.5         | 3.4       | amol C cell d <sup>-1</sup>             |
|                                                           |                | top high hypoxic     | 6        | 4.6         | 3.1       |                                         |
|                                                           |                | top low hypoxic      | 9        | 3.1         | 1.6       |                                         |
|                                                           |                | OMZ                  | 41       | 9.9         | 6.8       |                                         |
|                                                           |                | bottom low hypoxic   | 6        | 21.6        | 15.4      |                                         |
| <b>cell-specific Degradation rates of DCHO by GLUCase</b> | A-K            | top oxic             | 22       | 1.3         | 1.6       | amol C cell d <sup>-1</sup>             |
|                                                           |                | top high hypoxic     | 7        | 1.4         | 1.1       |                                         |
|                                                           |                | top low hypoxic      | 8        | 1.1         | 0.8       |                                         |
|                                                           |                | OMZ                  | 35       | 1.1         | 1.6       |                                         |
|                                                           |                | bottom low hypoxic   | 3        | 3.2         | 3.2       |                                         |
| <b>cell-specific LAPase Vmax</b>                          | A-K            | top oxic             | 22       | 23.1        | 15.1      | amol cell <sup>-1</sup> h <sup>-1</sup> |
|                                                           |                | top high hypoxic     | 10       | 44.1        | 29.7      |                                         |
|                                                           |                | top low hypoxic      | 10       | 39.9        | 23.0      |                                         |
|                                                           |                | OMZ                  | 49       | 103.5       | 114.2     |                                         |
|                                                           |                | bottom low hypoxic   | 6        | 274.1       | 51.7      |                                         |
| <b>cells-specific GLUCase Vmax</b>                        | A-K            | top oxic             | 26       | 0.9         | 0.4       | amol cell <sup>-1</sup> h <sup>-1</sup> |
|                                                           |                | top high hypoxic     | 9        | 1.5         | 0.6       |                                         |
|                                                           |                | top low hypoxic      | 11       | 1.3         | 0.5       |                                         |
|                                                           |                | OMZ                  | 41       | 2.7         | 2.4       |                                         |
|                                                           |                | bottom low hypoxic   | 4        | 6.0         | 3.6       |                                         |

97  
98  
99  
100  
101  
102  
103  
104  
105  
106  
107  
108

109 **References\_supplement**

110 Both, G. W., McInnes, J. L., Hanlon, J. E., May, B. K. and Elliott, W. H.: Evidence for an accumulation of  
111 messenger RNA specific for extracellular protease and its relevance to the mechanism of enzyme secretion in  
112 bacteria, *J. Mol. Biol.*, 67(2), 199–217, doi:10.1016/0022-2836(72)90236-7, 1972.

113 Elstner, E. F., Ed.: *Der Sauerstoff: Biochemie, Biologie, Medizin*, BI-Wiss\_Verl, Mannheim., 1990.

114 Endres, S., Galgani, L., Riebesell, U., Schulz, K.-G. and Engel, A.: Stimulated Bacterial Growth under Elevated  
115 pCO<sub>2</sub>: Results from an Off-Shore Mesocosm Study, edited by S. Dupont, *PLoS One*, 9(6), e99228,  
116 doi:10.1371/journal.pone.0099228, 2014.

117 Fischer, T., Banyte, D., Brandt, P., Dengler, M., Krahmann, G., Tanhua, T. and Visbeck, M.: Diapycnal oxygen  
118 supply to the tropical North Atlantic oxygen minimum zone, *Biogeosciences*, 10(7), 5079–5093, doi:10.5194/bg-10-  
119 5079-2013, 2013.

120 Osborn, T. R.: Estimates of the local rate of vertical diffusion from dissipation measurements, *J. Phys. Oceanogr.*,  
121 10(1), 83–89, doi:10.1175/1520-0485(1980)010<0083:EOTLRO>2.0.CO;2, 1980.

122 Piontek, J., Borchard, C., Sperling, M., Schulz, K. G., Riebesell, U. and Engel, A.: Response of bacterioplankton  
123 activity in an Arctic fjord system to elevated pCO<sub>2</sub>: results from a mesocosm perturbation study, *Biogeosciences*,  
124 10(1), 297–314, doi:10.5194/bg-10-297-2013, 2013.

125 Schafstall, J., Dengler, M., Brandt, P. and Bange, H.: Tidal-induced mixing and diapycnal nutrient fluxes in the  
126 Mauritanian upwelling region, *J. Geophys. Res.*, 115(C10), C10014, doi:10.1029/2009JC005940, 2010.

127
